# Supplementary material for: Metabolite profiling of Curcuma species grown in different regions using 1H NMR spectroscopy and multivariate analysis
Source: Royal Society of Chemistry journal article supplement (doi:10.1039/c2an35397k), 2012-01-01
Supplement: c2an35397k.pdf [file c2an35397k.pdf]

## Supplementary Information

### Metabolite Profiling of *Curcuma* Species Grown in Different Regions using $^1\text{H}$ NMR Spectroscopy and Multivariate Analysis

Youngae Jung<sup>†a</sup>, Jueun Lee<sup>†b</sup>, Ho Kyoung Kim<sup>cd</sup>, Byeong Cheol Moon<sup>c</sup>, Yunui Ji<sup>c</sup>

Do Hyun Ryu <sup>\*b</sup> , and Geum-Sook Hwang<sup>\*ae</sup>

<sup>a</sup>Integrated Metabolomics Research Group, Seoul Center, Korea Basic Science Institute, Seoul 136-713, Republic of Korea,

<sup>b</sup>Department of Chemistry, Sungkyunkwan University, Suwon 440-746, Republic of Korea,

<sup>c</sup>Basic Herbal Medicine Research Group, Herbal Medicine Research Division, Korea Institute of Oriental Medicine, Daejeon, 305-811, Republic of Korea

<sup>d</sup>Herbal Material Management Team, Herbal Medicine Research Division, Korea Institute of Oriental Medicine, Daejeon, 305-811, Republic of Korea

<sup>e</sup>Graduate School of Analytical Science and Technology, Chungnam National University, Daejeon 305-764, Republic of Korea

<sup>†</sup> These authors contributed equally to the work.

\* Corresponding author:

Geum-Sook Hwang: tel: +82 2 920 0737, fax: +82 2 920 0709, e-mail: [gshwang@kbsi.re.kr](mailto:gshwang@kbsi.re.kr);

Do Hyun Ryu: tel: +82-31-290-5931, fax: +82-31-290-5976, e-mail: [dhryu@skku.edu](mailto:dhryu@skku.edu)

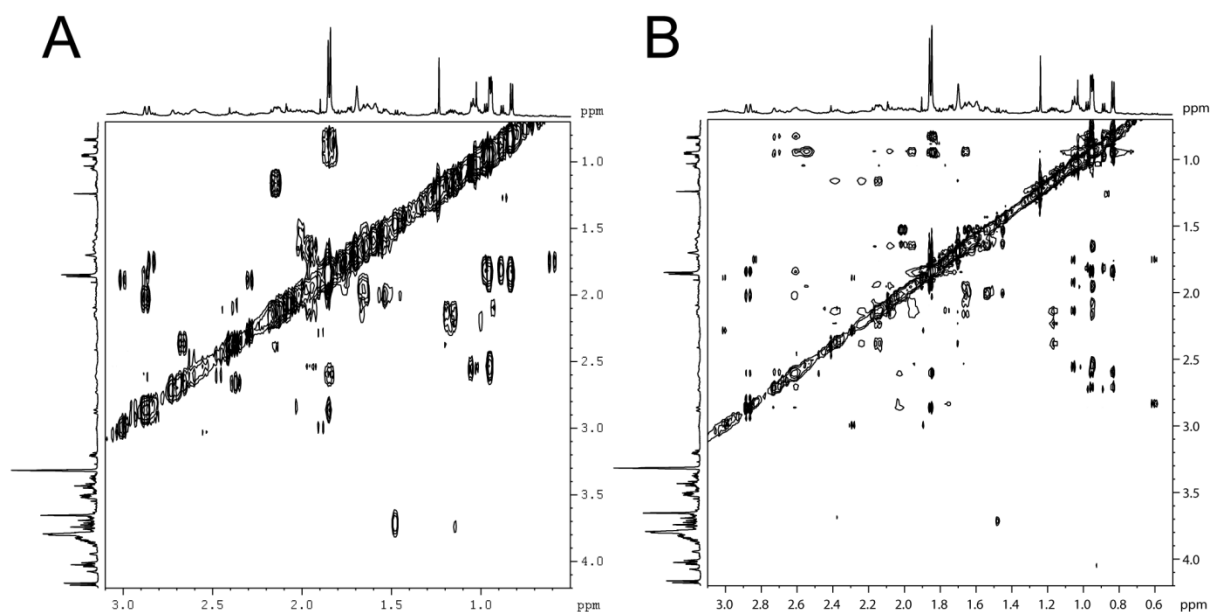

**Figure S1.** Expansion of representative COSY (A) and TOCSY (B) spectra of *Curcuma aromatica* extracts grown in Jeju-do, South Korea.

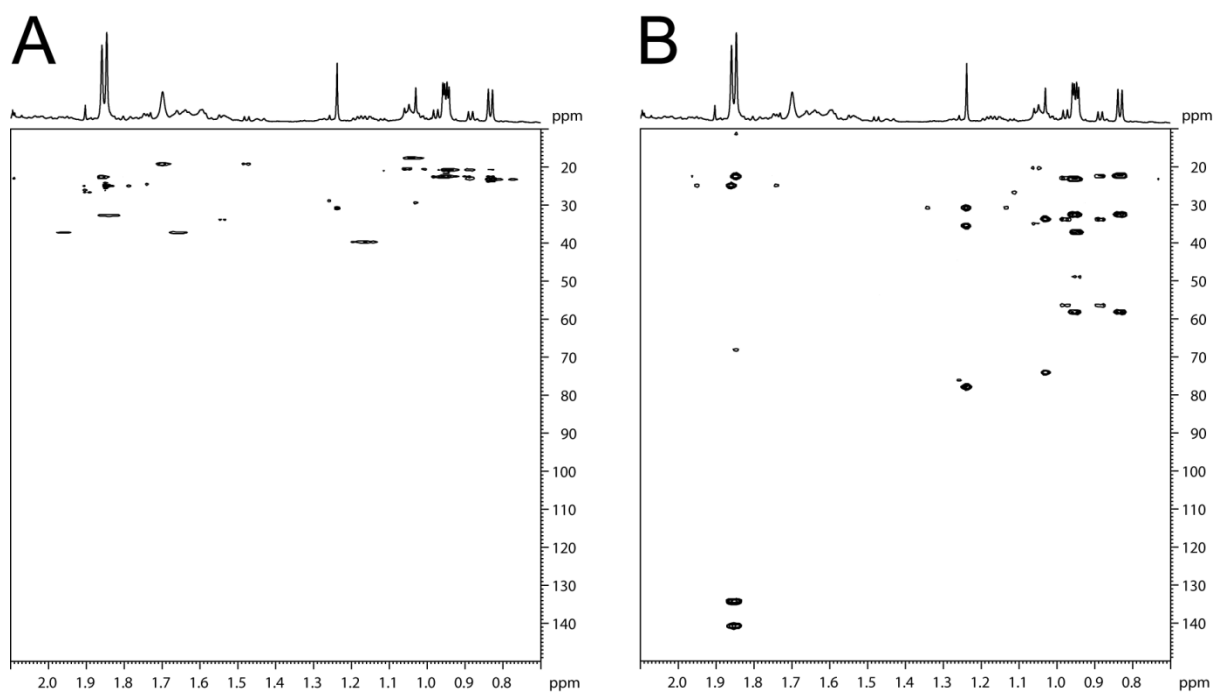

**Figure S2.** Expansion of representative HSQC (A) and HMBC (B) spectra of *Curcuma aromatica* extracts grown in Jeju-do, South Korea.
